# Supplementary material for: Scalable synthesis of Bi2O2S nanoplates with large piezoelectric potential induced by a built-in electric field in a [Bi2O2]2+ layer for the degradation of organic contaminants
Source: Royal Society of Chemistry journal article supplement (doi:10.1039/d4cc02439g), 2024-01-01
Supplement: d4cc02439g1.pdf [file d4cc02439g1.pdf]

## Supplementary information

### **Scalable synthesis of Bi<sub>2</sub>O<sub>2</sub>S nanoplates with large piezoelectric potential induced by built-in electric field in [Bi<sub>2</sub>O<sub>2</sub>]<sup>2+</sup> layer for degradation of organic dyes**

Zhende Wu,<sup>‡</sup> Jing Xie\*,<sup>‡</sup> Suixin Yin, Zhenjiang Lu, Jindou Hu, Yali Cao\*

State Key Laboratory of Chemistry and Utilization of Carbon Based Energy Resources, College of Chemistry, Xinjiang University, Urumqi, 830046, Xinjiang, PR China.

\*Corresponding author. Tel: +86-991-8583083; Fax: +86-991-8588883; Email: caoyali523@163.com (Y. Cao); xiejing@xju.edu.cn (J. Xie).

<sup>‡</sup> Authors with equal contributions to this work.

## Experimental section

### *S1. Chemicals*

Bismuth nitrate ( $\text{Bi}(\text{NO}_3)_3 \cdot 5\text{H}_2\text{O}$ , Aladdin Reagent Shanghai Co., Ltd.), sodium hydroxide (NaOH, Tianjin Xinbote Chemical Co., Ltd.), sublimated sulfur (S, Tianjin Best Chemical Co., Ltd.), precipitated sulfur (S, Tianjin Best Chemical Co., Ltd.), thioacetamide ( $\text{C}_2\text{H}_5\text{NS}$ , Aladdin Reagent Shanghai Co., Ltd.), and thiourea ( $\text{CH}_4\text{N}_2\text{S}$ , Aladdin Reagent Shanghai Co., Ltd.) were all commercially available analytically pure reagents in the experiment.

### *S2. Synthesis of $\text{Bi}_2\text{O}_2\text{S}$ nanosheets*

$\text{Bi}_2\text{O}_2\text{S}$  was synthesized via a low-heating solid-state chemical method. 4 mmol  $\text{Bi}(\text{NO}_3)_3 \cdot 5\text{H}_2\text{O}$  and 40 mmol NaOH were ground into powder, then the two compounds were mixed and ground until the reaction system turned yellow. 2 mmol of thiourea was added and ground for about 30 min until the reaction system turned dark red. The resulting mixture was sealed and placed in a conical flask, then placed in a water bath at  $80^\circ\text{C}$  for 12 h. Finally, the mixture was filtered and washed with distilled water, and the product was collected after drying and labeled as "BOS-S".

Other samples were fabricated with the same procedure except for the thiourea was replaced by thioacetamide, precipitated sulfur and sublimated sulfur, the corresponding products were labeled as "BOS-T", "BOS-C" and "BOS-H", respectively.

### *S3. Characterization of piezocatalysts*

The morphology was observed by field emission scanning electron microscopy (FESEM, Hitachi S-4800H) using an accelerating voltage of 5 kV, transmission electron microscopy (TEM, Hitachi H-600) using an accelerating voltage of 120 kV, and high-resolution transmission electron microscopy (HR-TEM, JEOL JEM-2010F) using an accelerating voltage of 200 kV. The element component was measured by the energy disperse X-ray spectrum (EDS, EDAXTLS). The crystallographic information of samples was investigated by performing X-ray powder diffraction (XRD) characterization using a D8 Advance X-ray diffractometer with non-monochromated

Cu K $\alpha$  X-ray source ( $\lambda=1.054056 \text{ \AA}$ ) in an operating voltage of 40 kV and a beam current of 40 mA. X-ray photoelectron spectroscopy (XPS) (Thermo Fisher Scientific ESCALAB250Xi) employing Al K $\alpha$  (1486.6 eV) was taken to identify the surface components and valence states of products. Hydroxyl ( $\cdot\text{OH}$ ) and super-oxide ( $\cdot\text{O}_2^-$ ) radicals were measured on electron spin resonance (ESR) spectrometer (MEX-nano, Bruker) via 5, 5-dimethyl-1-pyrroline N-oxide (DMPO). The optical properties and energy band structure of the samples were tested by UV-vis Diffuse Reflectance Spectroscopy (UV-vis, DRS). The piezoelectric properties were determined by piezo-response force microscopy (PFM, Bruker, ICON). Piezoelectric constants (d33) were calculated from the amplitude-voltage butterfly loops.

#### *S4. Piezocatalytic performances measurements*

A customized piezoelectric ultrasonic machine at 100 W, 40 kHz was used as the vibrational excitation source. The simulated pollutants chosen for this experiment were rhodamine B (RhB), tetracycline hydrochloride (TCH), methylene blue (MB), and methyl orange (MO). The volume of organic pollutants was 100 mL, the concentration of RhB, MB and MO were 5 mg L<sup>-1</sup>, the concentration of TCH was 10 mg L<sup>-1</sup>, and the amount of catalyst was 30 mg. The specific operation steps are as follows: the catalyst was dispersed in RhB (or TCH, MB, MO) solution, the system was stirred in the dark for 30 min before ultrasound to reach the physical adsorption-desorption equilibrium. In order to avoid the influence of high temperature on the piezoelectric catalytic performance, the water should be changed every 10 min. 4 mL of the pollutants were taken at fixed interval and centrifuged at high speed (8000 r/min, 5 min) to remove catalyst, the absorbance of the supernatant should be determined by UV-vis absorption photometer.

In addition, various scavengers were employed to elucidate the roles of different reactive species in the degradation process. p-Benzoquinone (BQ), isopropanol (IPA), triethanolamine (TEOA) and silver nitrate (AgNO<sub>3</sub>) were used as the trapping agents for  $\cdot\text{O}_2^-$  radicals,  $\cdot\text{OH}$  radicals,  $\text{h}^+$  and  $\text{e}^-$ , respectively. At the end of the dark reaction experiment, 10 mL of the radical trapping agent with the concentration of 1 mmol L<sup>-1</sup> was added into the catalytic reaction system, then the performance test was carried out.

### S5. The calculation of piezoelectric coefficient ( $d_{33}$ )

The  $d_{33}$  values could be acquired through calculating the corresponding slope of the Displacement-Voltage curve according to Equation:

$$d_{33} = (A - A_0) / (V - V_0)$$

Where  $V$  and  $A$  represent the applied voltage and amplitude respectively;  $V_0$  and  $A_0$  are the intersection point of the amplitude butterfly loop curve.

## Supplementary Figs and Tables

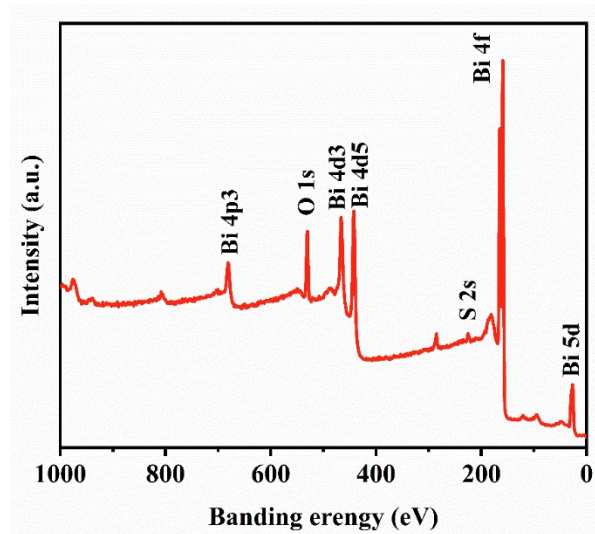

Fig. S1 XPS survey spectra of BOS-S.

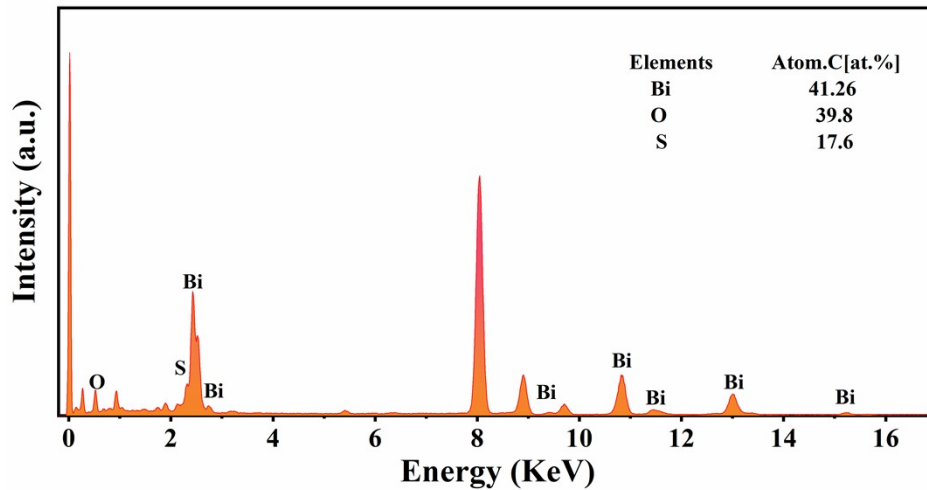

Fig. S2 EDS spectrum of BOS-S nanorods.

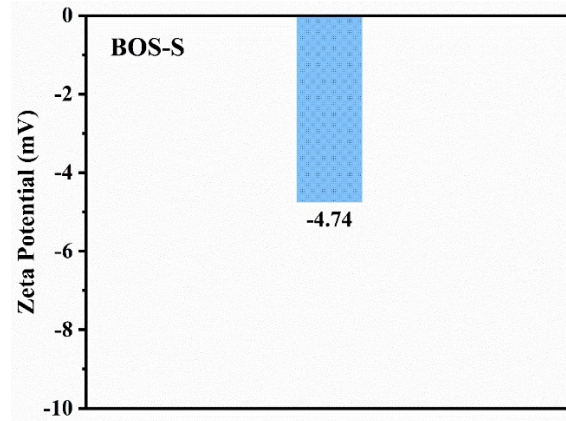

Fig. S3 Zeta potential of BOS-S.

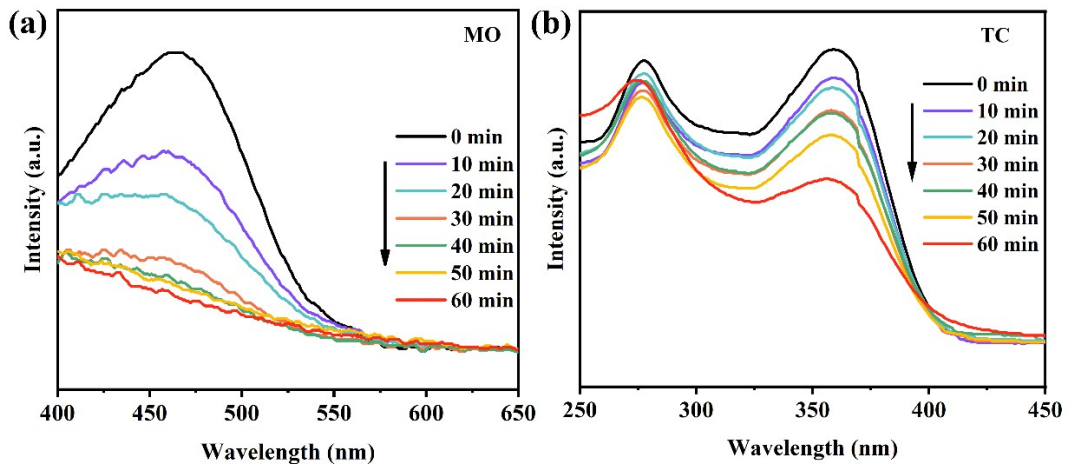

Fig. S4 UV-vis spectral change of (a) MO and (b) TC that piezoelectricity degraded by BOS-S.

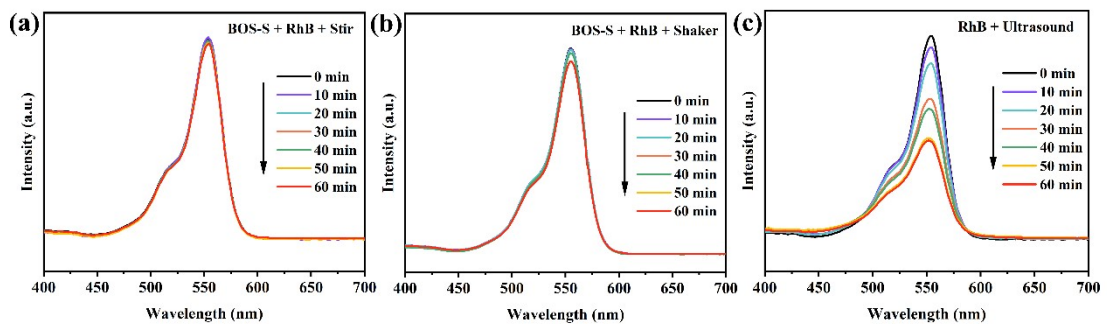

Fig. S5 (a) UV-vis spectral change of RhB under different conditions: (a) catalyst, dye and agitation, (b) catalyst, dye and shaker, (c) dye and ultrasound.

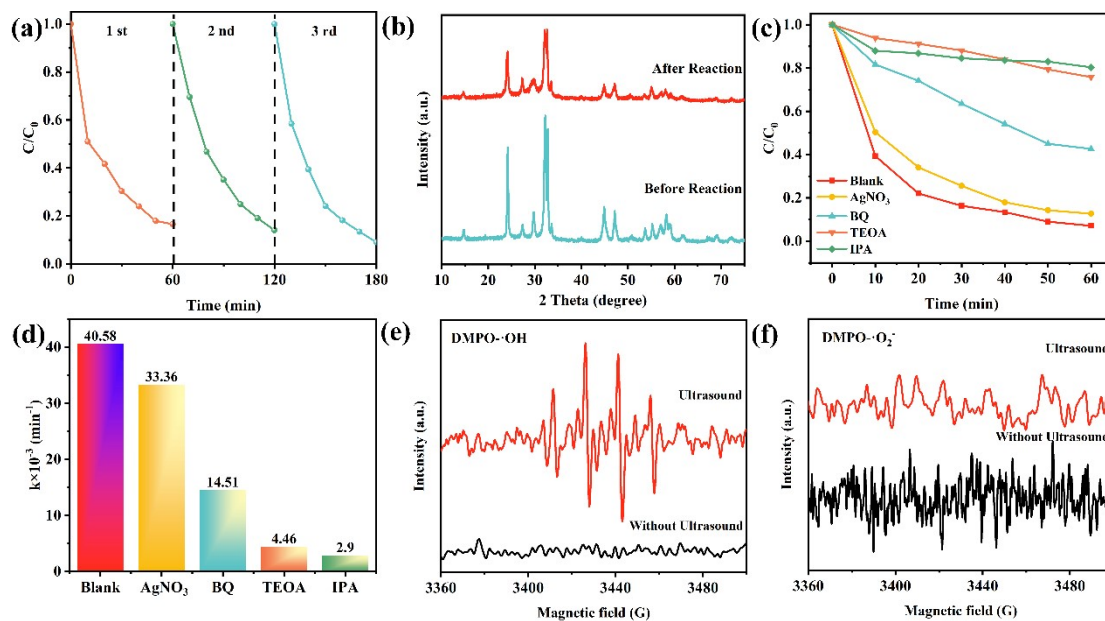

**Fig. S6** (a) Recycling measurements and (b) the XRD pattern of before and after piezocatalytic of RhB for BOS-S, (c) piezoelectric-catalyzed degradation of RhB dye by BOS-S in the presence of different radical scavengers, (d) kinetic rate constants of the reaction of BOS-S with different radical scavengers, (e) DMPO·OH ESR spectra of BOS-S in aqueous dispersions, (f) DMPO·O<sub>2</sub>· ESR spectra of BOS-S in MeOH dispersions

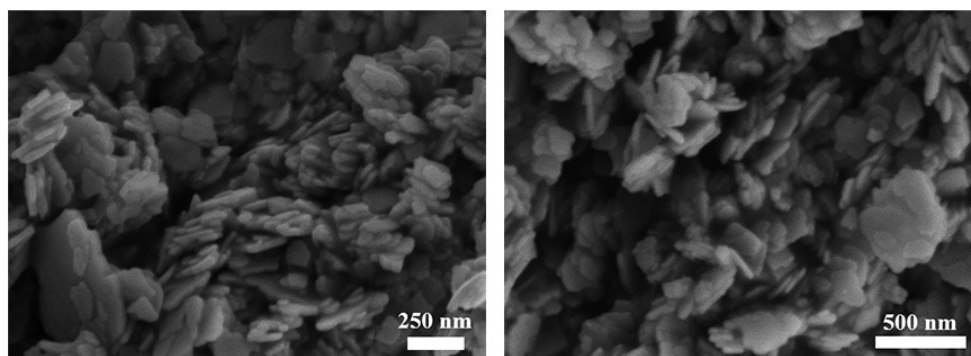

**Fig. S7.** The SEM of the BOS-S after cycling.

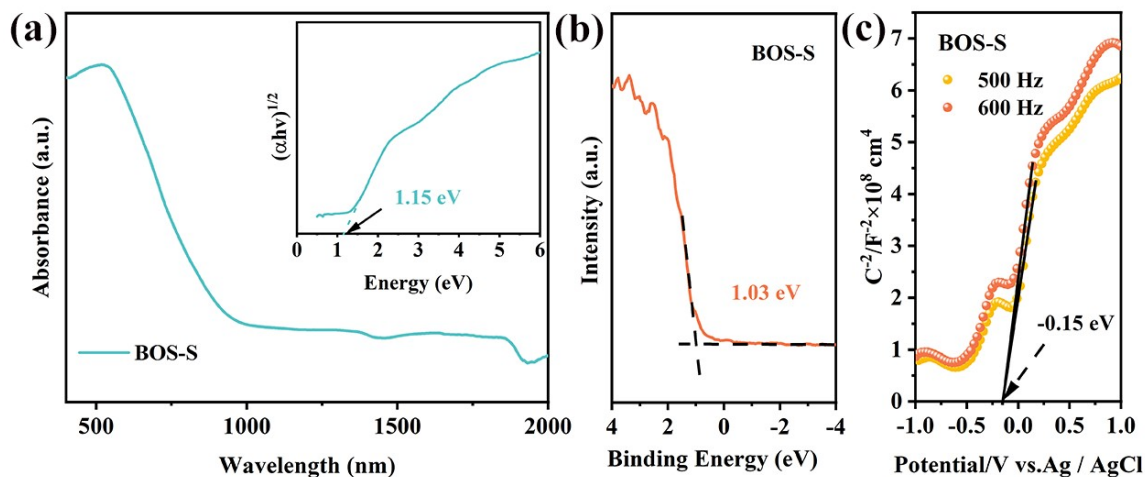

**Fig. S8** (a) UV-visible diffuse reflection spectrum (the insert is the relationship between  $(\alpha hv)^{1/2}$  and light energy ( $hv$ )), (b) XPS valence band spectrum and (c) Mott-Schottky curve of BOS-S sample.

The BOS-S sample presents a wide light absorption range from ultraviolet to visible then to near-infrared in Fig. S8a. The band-gap width of BOS-S is 1.15 eV through the fitting calculation of equation (1-1), in which BOS-S is an indirect band-gap semiconductor material, and the  $n$  value is  $1/2$ .<sup>1</sup> The XPS valence band of Fig. S8b shows a valence band potential ( $E_{VB}$ ) of BOS-S is 1.03 eV. The conduction band potential of BOS-S is calculated to be -0.12 eV according to equation (1-2). To further determine the energy band structure of BOS-S, Mott-Schottky curve (MS) is obtained. A positive slope of the curve is observed from Fig. S8c, indicating that BOS-S is an n-type semiconductor.<sup>2,3</sup> The intercept of the MS curve on the X-axis is the flat-band potential ( $E_{fb}$ ), the  $E_{fb}$  of BOS-S is -0.15 V (vs. Ag/AgCl). The  $E_{fb}$  ratio conduction band potential ( $E_{CB}$ ) for n-type semiconductors is corrected (0.20 V), and the  $E_{CB}$  for calculating BOS-S is -0.35 V vs. Ag/AgCl. Through equation (1-3) conversion, the  $E_{CB}$  of BOS-S is -0.15 eV (vs. NHE), which is basically consistent with the calculation result of XPS valence band.

$$(\alpha hv)^n = k(hv - E_g) \quad (1-1)$$

$$E_{CB} = E_{VB} - E_g \quad (1-2)$$

$$E_{NHE} = E_{Ag/AgCl} + 0.197 \text{ V} \quad (1-3)$$

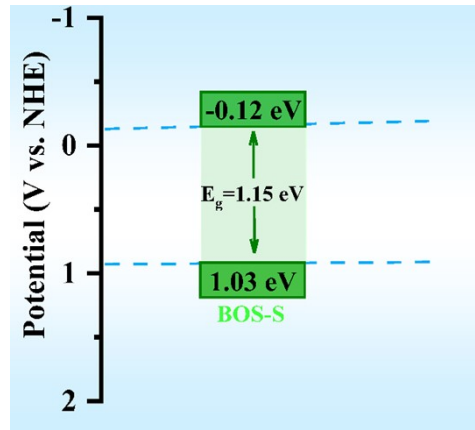

**Fig. S9** The energy band gap structure of BOS-S.



**Table S1.** Comparison of the piezoelectric coefficient ( $d_{33}$ ) of  $\text{Bi}_2\text{O}_2\text{S}$  with those of reported piezoelectric materials.

| <b>Piezocatalysts</b>                        | <b><math>d_{33}</math> (pm V<sup>-1</sup>)</b> | <b>reference</b> |
|----------------------------------------------|------------------------------------------------|------------------|
| $\text{Bi}_2\text{O}_2\text{S}$              | 29                                             | This work        |
| $\text{MoSe}_2/\text{PVDF}$                  | 6.5                                            | [4]              |
| $\text{BaTiO}_3/\text{TCN}$                  | 20.2                                           | [5]              |
| P-KNbO <sub>3</sub>                          | 10                                             | [6]              |
| $\text{Sn}_{0.97}\text{Ag}_{0.03}\text{S}_2$ | 4.5                                            | [7]              |
| $\text{Bi}_2\text{Fe}_4\text{O}_9$           | 4                                              | [8]              |
| $\text{MoS}_2/\text{Bi}_2\text{S}_3$         | 2.5                                            | [9]              |
| BFO MPL( $\text{BaTiO}_3$ )                  | 18.6                                           | [10]             |
| $\text{BiFeO}_3@\text{CdS}$                  | 4                                              | [11]             |
| $\text{In}_2\text{Se}_3$                     | 1.6                                            | [12]             |
| $\text{BaTiO}_3\text{NFs}$                   | 11.1                                           | [13]             |
| $\text{MoS}_2/\text{BP}$                     | 14.3                                           | [14]             |

**Table S2.** Comparison piezocatalytic degradation of organic pollutants performances over catalysts previously reported with this work.

| <b>Piezocatalysts</b>                                    | <b>Dyes species and concentration</b> | <b>Conditions</b> | <b>Degradation efficiency</b>    | <b>Reference</b> |
|----------------------------------------------------------|---------------------------------------|-------------------|----------------------------------|------------------|
| Bi <sub>2</sub> O <sub>2</sub> S                         | MB, 5 mg/L<br>RhB, 5 mg/L             | 100 W, 40 kHz     | 92.8%, 60 min.<br>97.7%, 60 min. | This work        |
| Ba(Zr <sub>0.05</sub> Ti <sub>0.95</sub> )O <sub>3</sub> | MB, 5 mg/L<br>RhB, 5 mg/L             | 180 W, 40 kHz     | 90%, 90 min.<br>70%, 90 min.     | [15]             |
| Au–ZnO                                                   | RhB, 5 mg/L                           | 80 W, 40 kHz      | 88%, 75 min.                     | [16]             |
| NaNbO <sub>3</sub>                                       | RhB, 5 mg/L                           | 50 W, 40 kHz      | 61.9%, 100 min.                  | [17]             |
| ZIF-8                                                    | RhB, 5 mg/L                           | 180 W, 40 kHz     | 94%, 150 min.                    | [18]             |
| BiVO <sub>4</sub>                                        | MB, 5 mg/L                            | 150 W, 40 kHz     | 86.4%, 40 min.                   | [19]             |
| Ag/LN-PVDF                                               | RhB, 5 mg/L<br>MB, 5 mg/L             | 70 W, 40 kHz      | 80%, 120 min.<br>89%, 120 min.   | [20]             |
| Pb(Zr <sub>0.52</sub> Ti <sub>0.48</sub> )O <sub>3</sub> | MB, 5 mg/L                            | 70 W, 40 kHz      | 84%, 120 min.                    | [21]             |
| CuS/ZnO                                                  | MB, 10 mg/L                           | 150 W, 40 kHz     | 94.7%, 40 min.                   | [22]             |
| BaTiO <sub>3</sub>                                       | MB, 5 mg/L                            | 120 W, 40 kHz     | 77.0%, 60 min.                   | [23]             |

## References

- 1 V. Cilamkoti, R.-K. Dutta, *Adv. Sustainable Syst.*, 2024, 2400034.
- 2 L.-S. Jiang, Z.-Y. Li, D.-Y. Wang, T.-Guo, and Y. Hu, *Appl. Surf. Sci.*, 2022, 601, 154185.
- 3 Y.-H. Wu, J.-S. Liu, J. Rong, Y.-Z. Zhang, Q. Liang, M. Zhou, Z.-Y. Li, and S. Xu, *Appl. Surf. Sci.*, 2023, 620, 156781.
- 4 X.-P. Chen, A.-J. Li, L.-L. Xing, J.-P. Wang, Y.-R. Sun, Y.-F. Wang, G.-Q. Chen, T.-L. Xing, and L. Xu, *J. Water Process Eng.*, 2024, **59**, 105015.
- 5 S.-X. Gong, W.-X. Zhang, Z.-R. Liang, Y.-J. Zhang, T. Gan, H.-Y. Hu, and Z.-Q. Huang, *Chem. Eng. J.*, 2023, **461**, 141947.
- 6 R. Huang, W. Cai, H. Zhang, Z.-H. Wang, Q. Zhan, R.-L. Gao, G. Chen, X.-L. Deng, X. Lei, J.-L. Dong, X.-Y. Liu, and C.-L. Fu, *J. Environ. Chem. Eng.*, 2023, **11**, 110177.
- 7 W.-R. Tian, J. Han, L.-C. Wan, N.-J. Li, D.-Y. Chen, Q.-F. Xu, H. Li, and J.-M. Lu, *Nano. Energy*, 2023, **107**, 108165.
- 8 V. Tiron, R.-J. Jie, I. Dumitru, N. Cimpoesu, I. Burducea, D. Iancu, A. Borhan, S. Gurlui, and G. Bulai, *Ceram. Int.*, 2023, **49**, 20304-20314.
- 9 J.-Y. Yue, R. Wu, Y. Zhang, N. Zhang, H.-T. Jing, S.-H. Wei, and F.-P. Ouyang, *Appl. Surf. Sci.*, 2023, **623**, 157033.
- 10 T.-N. Nguyen, K.-S. Chang, *J. Environ. Chem. Eng.*, 2022, **10**, 107213.
- 11 J.-J. Long, T.-T. Ren, J. Han, N.-J. Li, D.-Y. Chen, Q.-F. Xu, H. Li, and J.-M. Lu, *Sep. Purif. Technol.*, 2022, **290**, 120861.
- 12 J. Xu, W. Yang, S. Hu, X. Lai, and J. Jian, *J. Mater. Sci.*, 2022, **57**, 5072-5083.
- 13 D.-M. Liu, C.-C. Jin, F.-K. Shan, J.-J. He, and F. Wang, *ACS Appl. Mater. Interfaces*, 2020, **15**, 17443-17451.
- 14 M.-K. Mohanta, A. Rawat, N. Jena, Dimple, R. Ahammed, and A.-D. Sarkar, *ACS Appl. Mater. Interfaces*, 2019, **12**, 3114-3126.
- 15 M.-D. Zhu, S.-Q. Li, H.-F. Zhang, J. Gao, K.-W. Kwok, Y.-M. Jia, L.-B. Kong, W.-Y. Zhou, and B.-L. Peng, *Nano Energy*, 2021, **89**, 106474.

16. D.-L. Xiang, Z.-R. Liu, M.-Q. Wu, H.-H. Liu, X.-D. Zhang, Z. Wang, Z.-L. Wang, and L.-L. Li, *Small*, 2020, **16**, 1907603.
17. D. Fernandes, M.-M. Ferrer, C.-W. Raubach, M.-L. Moreira, L.-G. Jardim, E.-C. Moreira, F.-O. Graeff, and S.-S. Cava, *J. Am. Ceram. Soc.*, 2023, **106**, 399–409.
18. L.-J. Ruan, Y.-M. Jia, J.-F. Guan, B.-Xue, S.-H. Huang, Z. Wu, G.-R. Li, and X.-Z. Cui, *Sep. Purif. Technol.*, 2022, **28**, 3120159.
19. M. Kumar, I. Kebaili, R. Vaish, J.-E. Ghoul, and M.-U. Khandaker, *Mater. Today Commun.*, 2023, **37**, 107306.
20. G. Singh, M. Sharma, and R. Vaish, *ACS Appl. Mater. Interfaces*, 2021, **13**, 22914–22925.
21. S. Verma, M. Sharma, A. Halder, and R. Vaish, *Surf. Interfaces*, 2022, **30**, 101827.
22. X.-R. Ning, D.-Z. Jia, S.-H. Li, M.-F. Khan, and A.-Z. Hao, *Ceram. Int.*, 2023, **49**, 21658-21666.
23. A. Gaur, V.-S. Chauhan, and R. Vaish, *Environ. Sci. Adv.*, 2023, **2**, 462.
